# Supplementary material
Source: publisher figshare collection journal article supplement (https://rs.figshare.com/ndownloader/files/17290262)
Supplement: Supplementary file 1 [file 17290262]

## Sheet: Sheet1
Family	Masseter Character State	Citations for Character State	Genus	Species	NCBI Genome/BioSample Accession	Museum	Catalog Number	No. UCEs	Mean locus length	Standard Deviation	Full museum name
Cricetidae	myomorphy	Arata 1967; Satoh and Iwaku 2009; Hautier et al. 2008	Microtus	ochrogaster	GCA_000317375.1_MicOch1.0			2186	395.57	109.08
Abrocomidae	hystricomorphy	Wood 1985	Abrocoma	cinerea	SAMN10715111	MSB	238735	1909	390.96	111.41	Museum of Southwestern Biology
Muridae	myomorphy	Greene 1935; Turnbull 1970	Acomys	louisae	SAMN10715112	TK	25598	1896	394.7	109.72	Museum of Texas Tech University
Sciuridae	sciuromorphy	Turnbull 1970	Ammospermophilus	nelsoni	SAMN10715113	MSB	273395	1904	395.97	110.13	Museum of Southwestern Biology
Anomaluridae	hystricomorphy	Jaeger, Denys, and Coiffait 1985; Wood 1985; Hautier et al. 2008; Fabre et al. 2018	Anomalurus	derbianus	SAMN10715114	FMNH	222639	1749	371.05	118.04	Field Museum of Natural History
Aplodontiidae	protrogomorphy	Druzinsky 2010a	Aplodontia	rufa	SAMN10715115	UWBM	78582	1948	397.47	111.21	University of Washington Burke Museum
Hysticidae	hystricomorphy	Turnbull 1970	Atherurus	africanus	SAMN10715116	FMNH	195178	2144	390.63	114	Field Museum of Natural History
Nesomyidae	myomorphy	Arata 1967; Hautier et al. 2008	Beamys	major	SAMN10715117	FMNH	196217	2151	394.28	110	Field Museum of Natural History
Calomyscidae	myomorphy	Krystufek and Vohralik 2009	Calomyscus	baluchi	SAMN10715118	FMNH	140403	1758	371.93	114.1	Field Museum of Natural History
Castoridae	sciuromorphy	Cox and Baverstock 2016	Castor	canadensis	SAMN10715119	LSUMZ	35575	1924	392.15	111.2	Louisiana State University Museum of Natural Science
Caviidae	hystricomorphy	Woods 1972; Wood 1985	Cavia	porcellus	GCA_000151735.1_Cavpor3.0			2168	396.88	108.95
Chinchillidae	hystricomorphy	Woods 1972; Wood 1985	Chinchilla	lanigera	GCA_000276665.1_ChiLan1.0			2189	397.09	109.43
Erethizontidae	hystricomorphy	Woods 1972; Wood 1985	Coendou	bicolor	SAMN10715120	FMNH	203679	1874	375.15	117.7	Field Museum of Natural History
Geomyidae	sciuromorphy	Fahlbusch 1985; Brylski 1993	Cratogeomys	planiceps	SAMN10715121	LSUMZ	36120	1852	380.48	116.69	Louisiana State University Museum of Natural Science
Ctenodactylidae	hystricomorphy	Wood 1985; Hautier 2010	Ctenodactylus	gundi	SAMN10715122	TK	40889	1972	397.41	109.76	Museum of Texas Tech University
Ctenomyidae	hystricomorphy	Woods 1972; Wood 1985	Ctenomys	fochi	SAMN10715123	OMNH	23465	1863	369.17	119.35	University of Oklahoma Sam Noble Museum
Cuniculidae	hystricomorphy	Wood 1985	Cuniculus	paca	SAMN10715108	LSUMZ	28003	1360	348.19	110.27	Louisiana State University Museum of Natural Science
Dasyproctidae	hystricomorphy	Woods 1972; Wood 1985	Dasyprocta	fuliginosa	SAMN10715109	LSUMZ	28005	1557	362.38	113.03	Louisiana State University Museum of Natural Science
Dinomyidae	hystricomorphy	Wood 1985	Dinomys	branickii	SAMN10715124	FMNH	175246	1972	398.93	111.26	Field Museum of Natural History
Heteromyidae	sciuromorphy	Fahlbusch 1985; Brylski 1993	Dipodomys	ordii	GCA_000151885.2_Dord_2.0			2164	396.07	109.62
Bathyergidae	hystricomorphy	Van Daele et al. 2008	Fukomys	damarensis	GCA_000743615.1_DMR_v1.0			2179	396.72	109.09
Gliridae	hystricomorphy	Hautier et al. 2008	Graphiurus	kelleni	SAMN10715125	FMNH	151364	1907	387.83	112.64	Field Museum of Natural History
Heterocephalidae	protrogomorphy	Cox and Faulkes 2014	Heterocephalus	glaber	GCA_000247695.1_HetGla_female_1.0			2160	397.33	109.15
Heteromyidae	sciuromorphy	Fahlbusch 1985; Brylski 1993	Heteromys	oasicus	SAMN10715105	AMNH	276534	1707	361.7	114.97	American Museum of Natural History
Caviidae	hystricomorphy	Woods 1972; Wood 1985	Hydrochoerus	hydrochaeris	SAMN10715969	LSUMZ	25405	1686	370.03	117.13	Louisiana State University Museum of Natural Science
Sciuridae	sciuromorphy	Turnbull 1970	Ictidomys	tridecemlineatus	GCA_000236235.1_SpeTri2.0			2153	397.45	109.33
Dipodidae	hystricomorphy	Klingener 1964	Jaculus	jaculus	GCA_000280705.1_JacJac1.0			2162	396.47	109
Diatomyidae	hystricomorphy	Hautier and Saksiri 2009; Cox et al. 2013	Laonastes	aenigmamus	SAMN10715106	ANWC	M32051	1508	304.08	89.6	Australian National Wildlife Collection
Sciuridae	sciuromorphy	Turnbull 1970	Marmota	marmota	GCA_000945195.1_marMar2			2167	397.06	109.38
Cricetidae	myomorphy	Arata 1967; Satoh and Iwaku 2009; Hautier et al. 2008	Mesocricetus	auratus	GCA_000349665.1_MesAur1.0			2139	395.01	109.16
Muridae	myomorphy	Greene 1935; Turnbull 1970	Mus	musculus	GCA_000001635.6_GRCm38.p4			2147	396.55	108.92
Myocastoridae	hystricomorphy	Woods 1972, Wood 1985	Myocastor	coypus	SAMN10715110	LSUMZ	28556	1630	364.87	114.58	Louisiana State University Museum of Natural Science
Spalacidae	myomorphy	Bekele 1983	Nannospalax	galili	GCA_000622305.1_S.galili_v1.0			2159	396.15	109.34
Ochotonidae	N/A	N/A	Ochotona	princeps	GCA_000292845.1_OchPri3.0			2161	394.41	109.54
Octodontidae	hystricomorphy	Woods 1972; Wood 1985	Octodon	degus	GCA_000260255.1_OctDeg1.0			2173	397.43	109.49
Leporidae	N/A	N/A	Oryctolagus	cuniculus	GCA_000003625.1_OryCun2.0			2152	396.97	109.7
Pedetidae	hystricomorphy	Cox 2017	Pedetes	capensis	SAMN10715126	FMNH	160001	2132	386.88	111.57	Field Museum of Natural History
Cricetidae	myomorphy	Arata 1967; Satoh and Iwaku 2009; Hautier et al. 2008	Peromyscus	maniculatus	GCA_000500345.1_Pman_1.0			2178	396.12	109.35
Petromuridae	hystricomorphy	Woods 1972; Wood 1985	Petromus	typicus	SAMN10715133	CAS	29707	1939	398.86	109.68	California Academy of Sciences
Capromyidae	hystricomorphy	Woods and Hermanson 1985, Wood 1985	Plagiodontia	aedium	SAMN10715107	ROM	125346	148	240.17	49	Royal Ontario Museum
Platacanthomyidae	myomorphy	Arata 1967	Platacanthomys	lasiurus	SAMN10715127	MCZ	14770	570	203.16	48.85	Museum of Comparative Zoology
Echimyidae	hystricomorphy	Woods 1972; Wood 1985	Proechimys	goeldii	SAMN10715128	MVZ	197575	1834	382.85	113.6	Museum of Vertebrate Zoology
Muridae	myomorphy	Greene 1935; Turnbull 1970	Rattus	norvegicus	GCA_000001895.4_Rnor_6.0			2113	395.57	109.19
Cricetidae	myomorphy	Arata 1967; Satoh and Iwaku 2009; Hautier et al. 2008	Rhipidomys	austrinus	SAMN10715970	OMNH	34928	1898	394.98	109.94	University of Oklahoma Sam Noble Museum
Sicistidae	hystricomorphy	Klingener 1964	Sicista	concolor	SAMN10715129	UWBM	75285	1898	389.09	112.28	University of Washington Burke Museum
Dipodidae	hystricomorphy	Klingener 1964	Stylodipus	andrewsi	SAMN10715130	MSB	225058	1781	380.19	117.08	Museum of Southwestern Biology
Spalacidae	myomorphy	Bekele 1983	Tachyoryctes	daemon	SAMN10715131	FMNH	173826	1901	390.94	109.36	Field Museum of Natural History
Thryonomyidae	hystricomorphy	Woods 1972; Wood 1985	Thryonomys	gregorianus	SAMN10715132	FMNH	160977	2151	391.38	111.72	Field Museum of Natural History
Cricetidae	myomorphy	Arata 1967; Satoh and Iwaku 2009; Hautier et al. 2008	Tylomys	tumbalensis	SAMN10715134	MSB	213467	1892	394.77	110.98	Museum of Southwestern Biology
Platacanthomyidae	myomorphy	Arata 1967	Typhlomys	cinereus	SAMN10715135	ROM	118593	1481	350.27	111.72	Royal Ontario Museum
Zapodidae	hystricomorphy	Klingener 1964	Zapus	princeps	SAMN10715136	FMNH	173557	2105	392.96	111.33	Field Museum of Natural History
